# Supplementary figures and images for: Enzyme-less amperometric sensor manufactured using a Nafion–LaNiO3 nanocomposite for hydrogen peroxide
Source: Royal Society of Chemistry journal article supplement (doi:10.1039/d0ra03587d), 2020-01-01

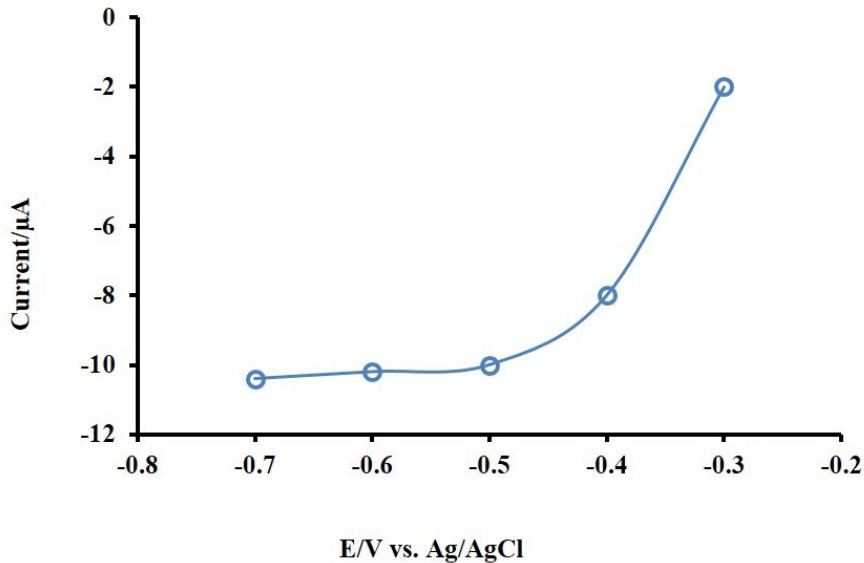

Supplement: d0ra03587d2.pdf [file d0ra03587d2.pdf]
